# Supplementary material
Source: PubMed Central journal article supplement (PMC307632)

# C57BI/6J

SCP3

$\gamma$ H2AX

Merge

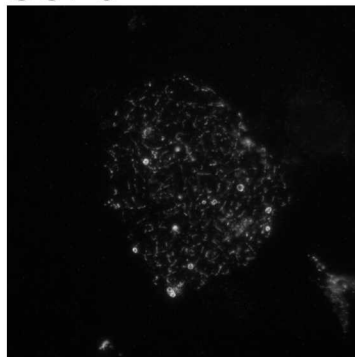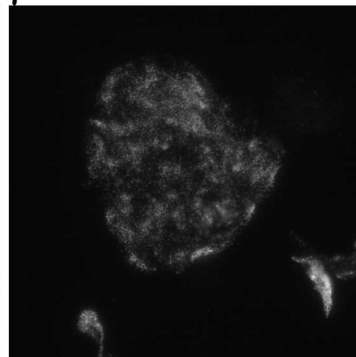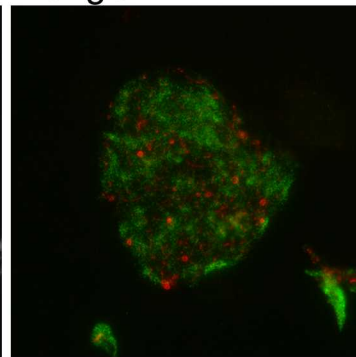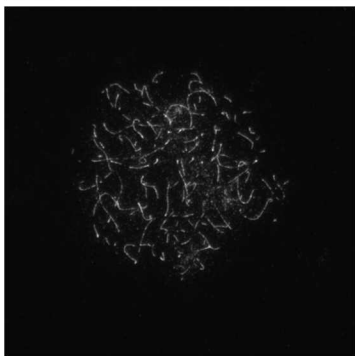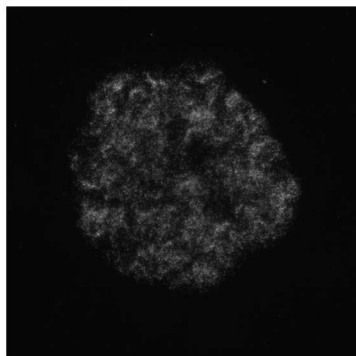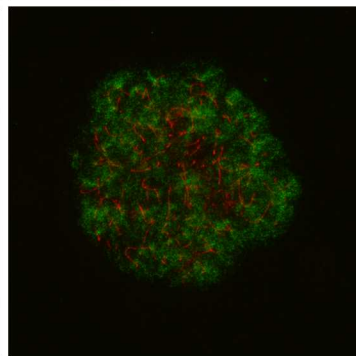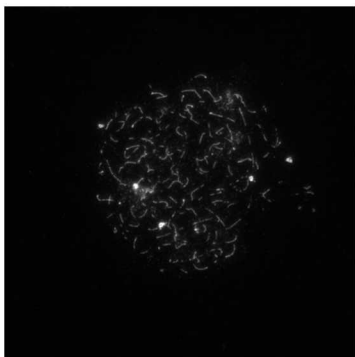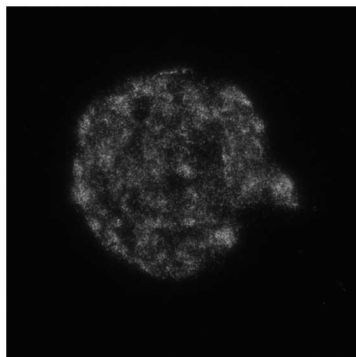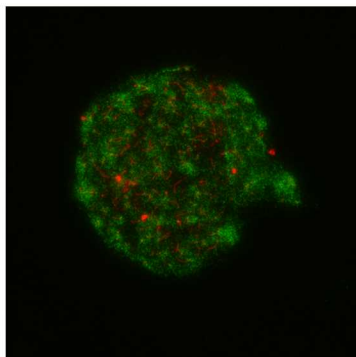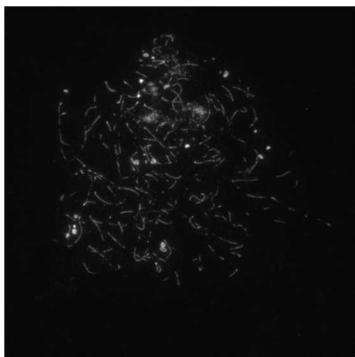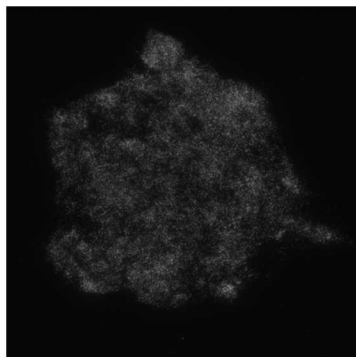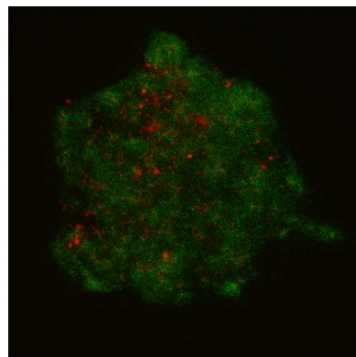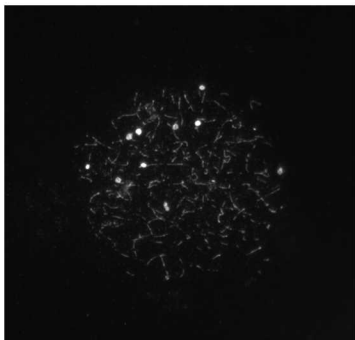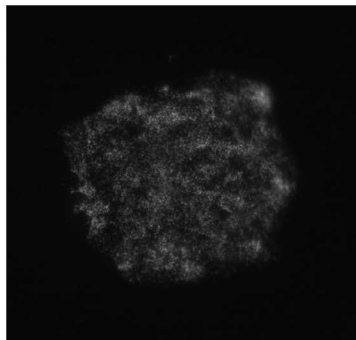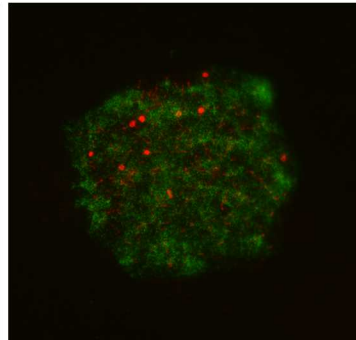

*Mei1*<sup>-/-</sup>

SCP3

$\gamma$ H2AX

Merge

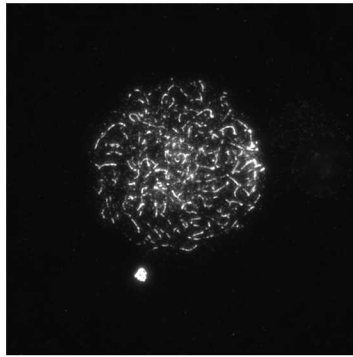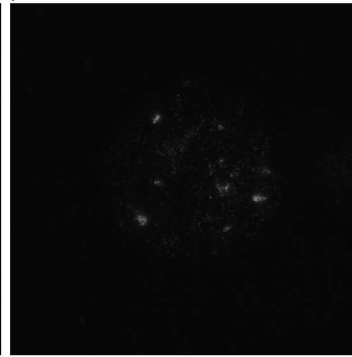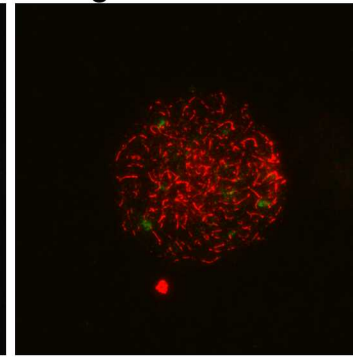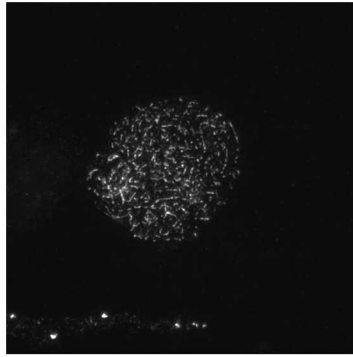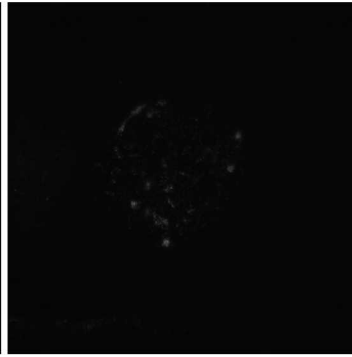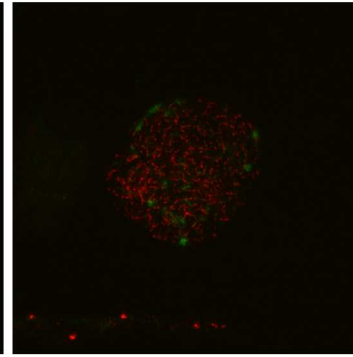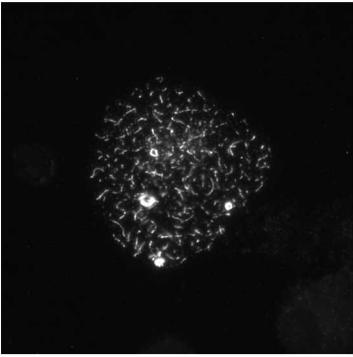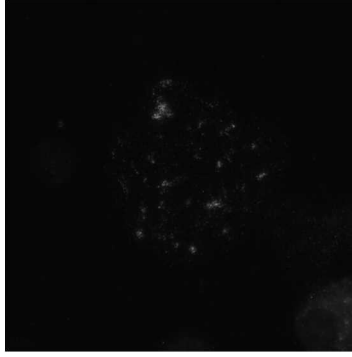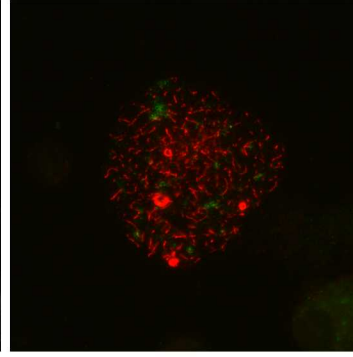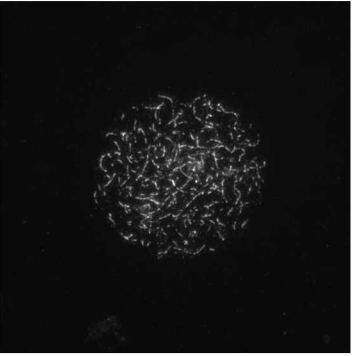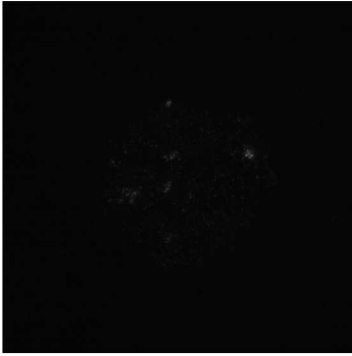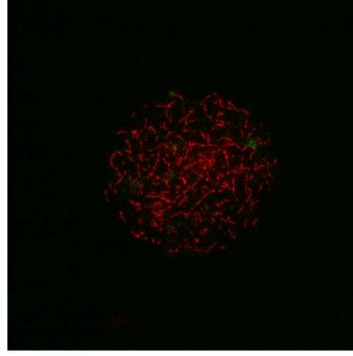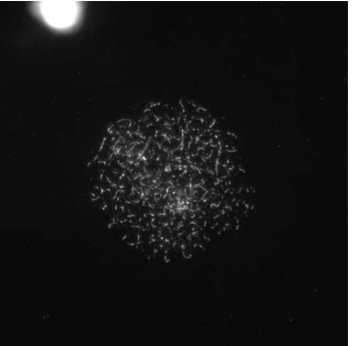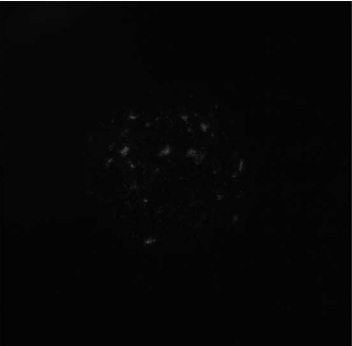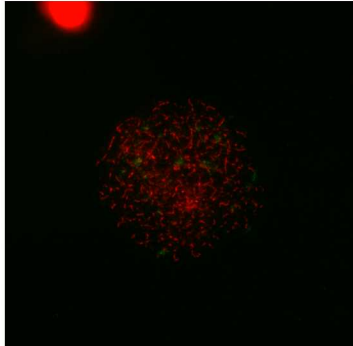

# *Spo11*<sup>-/-</sup>

SCP3

$\gamma$ H2AX

Merge

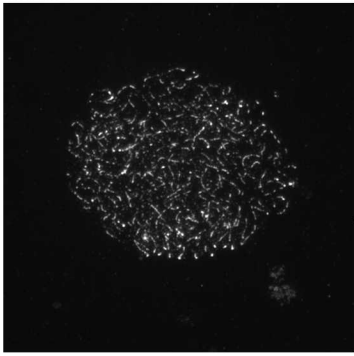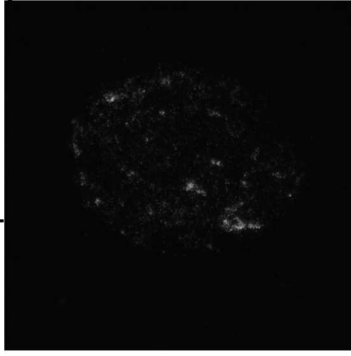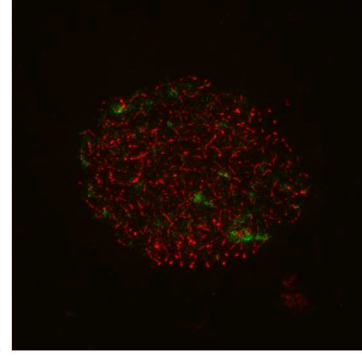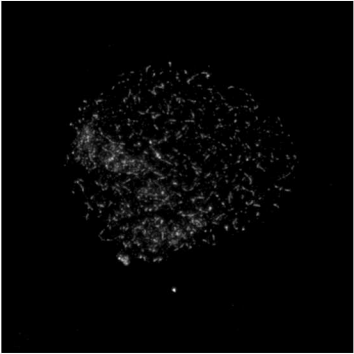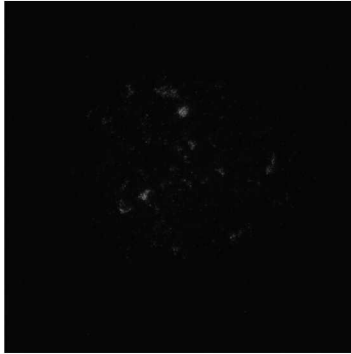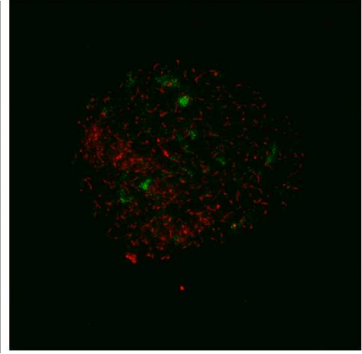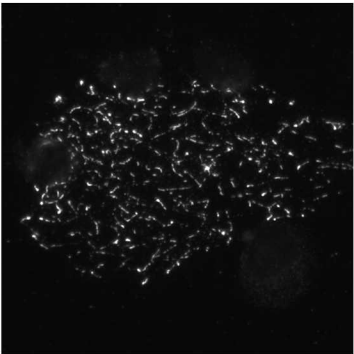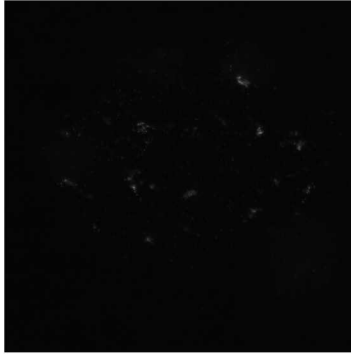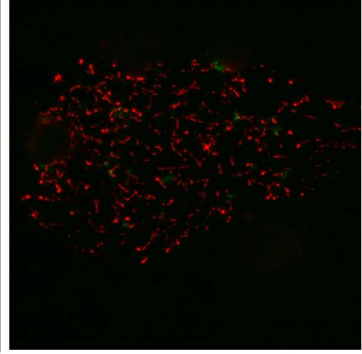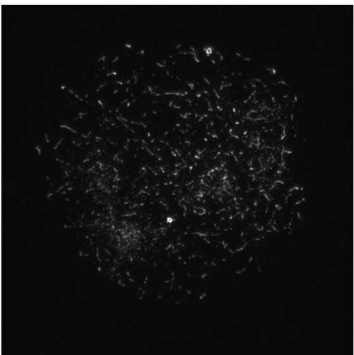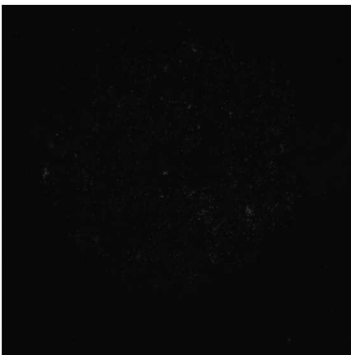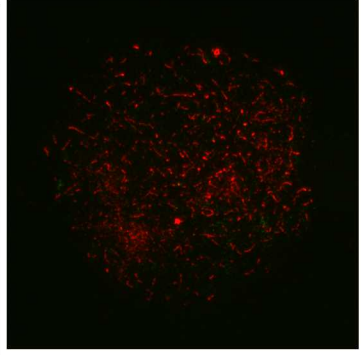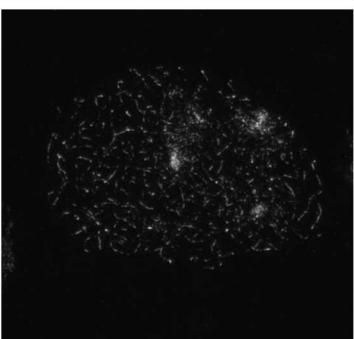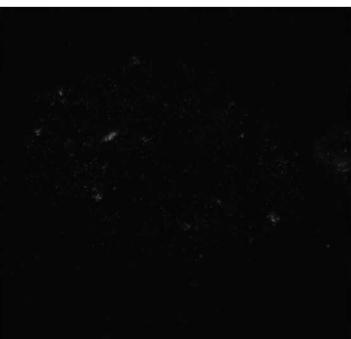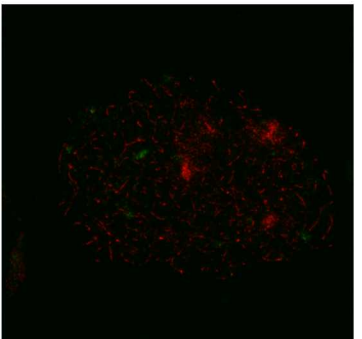

Supplement: pnas_100_26_15706__2.pdf [file pnas_100_26_15706__2.pdf]
